# Supplementary material for: Transcriptomics of a KDELR1 knockout cell line reveals modulated cell adhesion properties
Source: Springer Nature journal article supplement (doi:10.1038/s41598-019-47027-5), 2019-07-23
Supplement: MOESM1 [file 41598_2019_47027_MOESM1_ESM.pdf]

## **Transcriptomics of a KDELR1 knockout cell line reveals modulated cell adhesion properties**

\*Andrea Blum <sup>a</sup>, Saleem Khalifa <sup>b</sup>, Karl Nordström <sup>c</sup>, Martin Simon <sup>d</sup>, Marcel H. Schulz <sup>b,e</sup>, \*Manfred J. Schmitt <sup>a</sup>

<sup>a</sup>Molecular and Cell Biology, Department of Biosciences (FR 8.3) and Center of Human and Molecular Biology (ZHMB), Saarland University, D-66123 Saarbrücken, Germany.

<sup>b</sup>Cluster of Excellence, Multimodal Computing and Interaction, Saarland University and Department for Computational Biology and Applied Algorithmics, Max Planck Institute for Informatics, Saarland Informatics Campus

<sup>c</sup>Genetics/Epigenetics, Center for Human and Molecular Biology, Saarland University

<sup>d</sup>Molecular Cell Biology and Microbiology, Wuppertal University, D-42097 Wuppertal, Germany

<sup>e</sup>Institute for Cardiovascular Regeneration, Goethe University Frankfurt, 60590 Frankfurt am Main

**Supplementary Table S1:** DEGs of the transcriptome analysis comparing HAP1 wild-type and HAP1 KDELR1-KO cells

| Gene-ID            | Gene name | adjusted p-value | Fold-Change  |
|--------------------|-----------|------------------|--------------|
| ENSG00000180353.10 | HCLS1     | 2,32E-70         | -8,20919219  |
| ENSG00000026025.15 | VIM       | 2,24E-59         | -5,0347944   |
| ENSG00000186340.14 | THBS2     | 9,49E-56         | -6,444271646 |
| ENSG00000145242.13 | EPHA5     | 2,33E-51         | 7,158160571  |
| ENSG00000185222.8  | TCEAL9    | 1,11E-43         | -9,157984695 |
| ENSG00000178522.14 | AMBN      | 9,50E-41         | -4,125701454 |
| ENSG00000197565.15 | COL4A6    | 1,31E-40         | -4,692394641 |
| ENSG00000130303.12 | BST2      | 5,90E-37         | -8,238463683 |
| ENSG00000052850.5  | ALX4      | 1,49E-32         | -5,301034698 |
| ENSG00000152217.16 | SETBP1    | 5,04E-29         | -4,986919273 |
| ENSG00000132718.8  | SYT11     | 7,23E-29         | -2,856189592 |
| ENSG00000156299.13 | TIAM1     | 3,09E-27         | 3,314667192  |
| ENSG00000134802.17 | SLC43A3   | 2,79E-26         | -3,255057521 |
| ENSG00000169594.13 | BNC1      | 8,57E-26         | 3,337302104  |
| ENSG00000092345.13 | DAZL      | 9,43E-26         | -4,048958829 |
| ENSG00000136960.12 | ENPP2     | 1,72E-23         | -4,265987206 |
| ENSG00000157064.10 | NMNAT2    | 4,62E-23         | 4,099707417  |
| ENSG00000224039.1  | CDYLP1    | 7,25E-23         | -4,443883553 |
| ENSG00000284109.1  | CDYLP1    | 7,25E-23         | -4,443883553 |
| ENSG00000221818.8  | EBF2      | 1,13E-22         | 4,379950994  |
| ENSG00000154645.13 | CHODL     | 3,87E-21         | 3,524182313  |
| ENSG00000172461.10 | FUT9      | 2,71E-20         | -6,161620907 |
| ENSG00000050030.13 | NEXMIF    | 1,16E-19         | -4,429603346 |
| ENSG00000134531.9  | EMP1      | 1,58E-18         | -3,796898784 |
| ENSG00000147027.3  | TMEM47    | 1,93E-17         | 3,54139651   |
| ENSG00000136542.8  | GALNT5    | 2,32E-17         | 3,15562015   |
| ENSG00000150051.13 | MKX       | 2,96E-17         | 3,666343008  |
| ENSG00000104313.17 | EYA1      | 8,07E-17         | 2,641365369  |
| ENSG00000136859.9  | ANGPTL2   | 6,34E-16         | -4,755047396 |
| ENSG00000101144.12 | BMP7      | 8,79E-16         | -9,184378464 |
| ENSG00000137558.7  | PII5      | 8,79E-16         | -4,493403278 |
| ENSG00000204262.11 | COL5A2    | 8,79E-16         | 2,777971672  |
| ENSG00000118246.13 | FASTKD2   | 1,05E-15         | 2,638411958  |
| ENSG00000117477.12 | CCDC181   | 1,12E-15         | 3,593367315  |
| ENSG00000133687.15 | TMTC1     | 1,13E-15         | 3,09982207   |
| ENSG00000180964.16 | TCEAL8    | 8,95E-15         | -9,655678938 |
| ENSG00000153714.5  | LURAP1L   | 1,25E-14         | 3,409262296  |
| ENSG00000140563.14 | MCTP2     | 8,16E-14         | 2,926461579  |
| ENSG00000128918.14 | ALDH1A2   | 1,53E-13         | 2,954190991  |
| ENSG00000113805.8  | CNTN3     | 3,78E-13         | 5,455882107  |
| ENSG00000178403.3  | NEUROG2   | 4,98E-13         | 2,193681171  |
| ENSG00000165025.14 | SYK       | 5,05E-13         | 2,306040027  |
| ENSG00000124019.9  | FAM124B   | 1,52E-12         | -2,987057179 |
| ENSG00000165323.15 | FAT3      | 1,52E-12         | -4,453288811 |

|                    |          |          |              |
|--------------------|----------|----------|--------------|
| ENSG00000188730.4  | VWC2     | 1,52E-12 | 3,816708215  |
| ENSG00000282908.1  | FAT3     | 1,52E-12 | -4,453288811 |
| ENSG00000186103.3  | ARGFX    | 2,57E-11 | -5,974439501 |
| ENSG00000170775.2  | GPR37    | 3,24E-11 | 1,708551779  |
| ENSG00000213694.3  | S1PR3    | 9,01E-11 | 2,622634285  |
| ENSG00000080986.12 | NDC80    | 1,81E-10 | -2,054586556 |
| ENSG00000155961.4  | RAB39B   | 2,22E-10 | -5,370799311 |
| ENSG00000007062.11 | PROM1    | 2,76E-10 | 2,44985619   |
| ENSG00000173157.16 | ADAMTS20 | 3,20E-10 | 3,529672966  |
| ENSG00000155093.17 | PTPRN2   | 3,71E-10 | -9,343494164 |
| ENSG00000060718.20 | COL11A1  | 3,85E-10 | -5,856246494 |
| ENSG00000156475.18 | PPP2R2B  | 6,62E-10 | -1,846021285 |
| ENSG00000135373.12 | EHF      | 7,10E-10 | -2,819513437 |
| ENSG00000182968.4  | SOX1     | 1,23E-09 | 2,934854404  |
| ENSG00000138771.14 | SHROOM3  | 1,28E-09 | -2,046658826 |
| ENSG00000038427.15 | VCAN     | 1,33E-09 | -2,771822208 |
| ENSG00000004468.12 | CD38     | 1,84E-09 | 2,958988024  |
| ENSG00000117600.12 | PLPPR4   | 1,87E-09 | 2,801732618  |
| ENSG00000164651.16 | SP8      | 1,93E-09 | 2,11792535   |
| ENSG00000026508.17 | CD44     | 2,13E-09 | -3,635882504 |
| ENSG00000183421.11 | RIPK4    | 2,56E-09 | 3,379697219  |
| ENSG00000156689.6  | GLYATL2  | 4,16E-09 | -2,941401181 |
| ENSG00000234444.9  | ZNF736   | 4,49E-09 | -2,522187761 |
| ENSG00000188227.12 | ZNF793   | 6,41E-09 | -1,879122299 |
| ENSG00000163536.12 | SERPINI1 | 7,65E-09 | 2,510119009  |
| ENSG00000183117.18 | CSMD1    | 7,75E-09 | -1,861917181 |
| ENSG00000212747.4  | RTL8B    | 8,12E-09 | -2,335614413 |
| ENSG00000164120.13 | HPGD     | 9,24E-09 | 1,869581141  |
| ENSG00000198398.2  | TMEM207  | 1,39E-08 | 3,297616809  |
| ENSG00000144410.4  | CPO      | 1,53E-08 | 2,77396218   |
| ENSG00000067445.20 | TRO      | 2,75E-08 | -3,386895505 |
| ENSG00000151789.10 | ZNF385D  | 2,79E-08 | -5,162765145 |
| ENSG00000183807.7  | FAM162B  | 2,79E-08 | 2,128875282  |
| ENSG00000038295.7  | TLL1     | 3,16E-08 | 2,782313082  |
| ENSG00000138944.7  | KIAA1644 | 3,16E-08 | -2,246579395 |
| ENSG00000120675.5  | DNAJC15  | 3,56E-08 | -3,360531258 |
| ENSG00000154040.20 | CABYR    | 3,82E-08 | 1,890197566  |
| ENSG00000114315.3  | HES1     | 3,83E-08 | -1,632061252 |
| ENSG00000170370.11 | EMX2     | 5,70E-08 | 2,999212322  |
| ENSG00000198354.6  | DCAF12L2 | 6,80E-08 | -7,114818738 |
| ENSG00000105438.8  | KDELRL1  | 7,49E-08 | -2,307905645 |
| ENSG00000164112.12 | TMEM155  | 9,90E-08 | -8,372205904 |
| ENSG00000135917.13 | SLC19A3  | 1,22E-07 | 1,828919506  |
| ENSG00000196781.14 | TLE1     | 1,43E-07 | 1,737540117  |
| ENSG00000127507.17 | ADGRE2   | 2,09E-07 | -2,313982897 |
| ENSG00000189056.13 | RELN     | 2,20E-07 | -2,260017977 |
| ENSG00000101605.12 | MYOM1    | 2,78E-07 | 1,834984623  |

|                    |         |          |              |
|--------------------|---------|----------|--------------|
| ENSG00000131018.22 | SYNE1   | 3,50E-07 | 1,629489533  |
| ENSG00000105894.11 | PTN     | 4,34E-07 | 7,993379508  |
| ENSG00000166265.11 | CYYR1   | 4,34E-07 | -1,487847657 |
| ENSG00000146215.13 | CRIP3   | 4,57E-07 | 2,721786442  |
| ENSG00000138119.16 | MYOF    | 4,79E-07 | -2,689944938 |
| ENSG00000282230.1  | ADAM9   | 4,84E-07 | -9,771329227 |
| ENSG00000175538.10 | KCNE3   | 4,96E-07 | -2,517244009 |
| ENSG00000114200.9  | BCHE    | 6,39E-07 | 2,142711186  |
| ENSG00000180806.4  | HOXC9   | 7,00E-07 | -2,546087755 |
| ENSG00000172554.11 | SNTG2   | 7,83E-07 | 1,364715751  |
| ENSG00000171617.13 | ENC1    | 8,86E-07 | -2,363231662 |
| ENSG00000261787.1  | TCF24   | 9,56E-07 | 2,079687529  |
| ENSG00000164107.8  | HAND2   | 1,04E-06 | 1,791465735  |
| ENSG00000187957.7  | DNER    | 1,04E-06 | 2,463684386  |
| ENSG00000180660.7  | MAB21L1 | 1,08E-06 | 1,685520694  |
| ENSG00000047648.21 | ARHGAP6 | 1,35E-06 | 1,980810894  |
| ENSG00000164695.4  | CHMP4C  | 1,36E-06 | -3,203613096 |
| ENSG00000134343.12 | ANO3    | 1,47E-06 | 2,933573051  |
| ENSG00000134330.18 | IAH1    | 2,34E-06 | 1,654124812  |
| ENSG00000146938.14 | NLGN4X  | 2,34E-06 | -7,720372999 |
| ENSG00000107562.16 | CXCL12  | 2,58E-06 | 7,627208709  |
| ENSG00000197608.11 | ZNF841  | 3,02E-06 | -2,198238479 |
| ENSG00000154589.6  | LY96    | 3,08E-06 | 2,825159757  |
| ENSG00000016402.13 | IL20RA  | 3,13E-06 | 1,638919206  |
| ENSG00000174473.15 | GALNTL6 | 3,16E-06 | 1,962486634  |
| ENSG00000125266.6  | EFNB2   | 3,64E-06 | -2,163770325 |
| ENSG00000165973.18 | NELL1   | 3,71E-06 | -2,032162183 |
| ENSG00000133106.14 | EPSTI1  | 3,72E-06 | -4,69593448  |
| ENSG00000120658.13 | ENOX1   | 3,78E-06 | -1,828624177 |
| ENSG00000138792.9  | ENPEP   | 3,89E-06 | -2,793741186 |
| ENSG00000070915.9  | SLC12A3 | 4,17E-06 | -4,606574847 |
| ENSG00000123612.15 | ACVR1C  | 4,54E-06 | 3,150502464  |
| ENSG00000173930.8  | SLCO4C1 | 5,28E-06 | 2,172181735  |
| ENSG00000112562.18 | SMOC2   | 6,12E-06 | -3,755424553 |
| ENSG00000177570.13 | SAMD12  | 7,56E-06 | 2,130404127  |
| ENSG00000269190.5  | FBXO17  | 8,04E-06 | 2,483010586  |
| ENSG00000282954.1  | FBXO17  | 8,04E-06 | 2,483010586  |
| ENSG00000164796.17 | CSMD3   | 8,29E-06 | 1,8192867    |
| ENSG00000196109.6  | ZNF676  | 9,24E-06 | -7,405771704 |
| ENSG00000142871.16 | CYR61   | 9,31E-06 | -1,51961135  |
| ENSG00000155530.2  | LRGUK   | 9,37E-06 | 1,774508801  |
| ENSG00000135547.8  | HEY2    | 9,60E-06 | 5,476322571  |
| ENSG00000178573.6  | MAF     | 1,02E-05 | 1,290124143  |
| ENSG00000135218.17 | CD36    | 1,06E-05 | 1,907951223  |
| ENSG00000113209.8  | PCDHB5  | 1,15E-05 | 1,480839899  |
| ENSG00000154330.12 | PGM5    | 1,19E-05 | 1,720891193  |
| ENSG00000178053.17 | MLF1    | 1,43E-05 | -3,824184867 |

|                    |          |             |              |
|--------------------|----------|-------------|--------------|
| ENSG00000134954.14 | ETS1     | 1,47E-05    | 1,434203949  |
| ENSG00000241166.6  | HLA-L    | 1,76E-05    | -21,12903774 |
| ENSG00000156076.9  | WIF1     | 1,87E-05    | -7,250531303 |
| ENSG00000197584.11 | KCNMB2   | 2,29E-05    | -1,790632628 |
| ENSG00000128714.5  | HOXD13   | 2,35E-05    | 1,559741577  |
| ENSG00000170162.13 | VGLL2    | 2,57E-05    | 6,053639772  |
| ENSG00000260027.4  | HOXB7    | 3,01E-05    | -6,757189325 |
| ENSG00000105143.12 | SLC1A6   | 3,05E-05    | -2,202066817 |
| ENSG00000114455.13 | HHLA2    | 3,93E-05    | -2,08237609  |
| ENSG00000163347.5  | CLDN1    | 4,20E-05    | 1,30705518   |
| ENSG00000111335.12 | OAS2     | 4,22E-05    | -2,038032145 |
| ENSG00000120833.13 | SOCS2    | 4,42E-05    | -1,840720452 |
| ENSG00000133019.11 | CHRM3    | 5,15E-05    | 2,11184731   |
| ENSG00000100234.11 | TIMP3    | 5,25E-05    | -1,482401651 |
| ENSG00000144229.11 | THSD7B   | 5,63E-05    | -2,063834695 |
| ENSG00000046889.18 | PREX2    | 5,76E-05    | -2,058898634 |
| ENSG00000197705.9  | KLHL14   | 6,30E-05    | 1,837302613  |
| ENSG00000118971.7  | CCND2    | 6,49E-05    | -1,542459098 |
| ENSG00000180730.4  | SHISA2   | 6,78E-05    | 1,361627769  |
| ENSG00000188385.11 | JAKMIP3  | 6,98E-05    | -2,667364021 |
| ENSG00000163631.16 | ALB      | 7,31E-05    | 2,393744492  |
| ENSG00000146197.8  | SCUBE3   | 7,36E-05    | -1,197722706 |
| ENSG00000179344.16 | HLA-DQB1 | 7,52E-05    | 4,352078733  |
| ENSG00000219438.8  | FAM19A5  | 7,55E-05    | -7,123259612 |
| ENSG00000082497.11 | SERTAD4  | 7,91E-05    | 1,607344647  |
| ENSG00000134769.21 | DTNA     | 7,91E-05    | -2,486491283 |
| ENSG00000281230.2  | SERTAD4  | 7,91E-05    | 1,607344647  |
| ENSG00000059804.15 | SLC2A3   | 8,00E-05    | 1,370062986  |
| ENSG00000134853.11 | PDGFRA   | 8,72E-05    | -1,962848852 |
| ENSG00000144681.10 | STAC     | 9,25E-05    | 1,377070936  |
| ENSG00000078018.19 | MAP2     | 9,41E-05    | 2,092569786  |
| ENSG00000186854.10 | TRABD2A  | 0,000101958 | -1,30290113  |
| ENSG00000198131.13 | ZNF544   | 0,000101958 | 2,413000548  |
| ENSG00000118946.11 | PCDH17   | 0,000105366 | 1,376030134  |
| ENSG00000075388.3  | FGF4     | 0,000117648 | -2,27627795  |
| ENSG00000104237.7  | RP1      | 0,000122604 | 2,17962717   |
| ENSG00000144339.11 | TMEFF2   | 0,000122604 | 2,085213107  |
| ENSG00000147145.12 | LPAR4    | 0,000122604 | 2,007748999  |
| ENSG00000107242.17 | PIP5K1B  | 0,000125572 | 2,081098838  |
| ENSG00000134202.10 | GSTM3    | 0,000131295 | 1,588939623  |
| ENSG00000121742.16 | GJB6     | 0,000133662 | 1,320666818  |
| ENSG00000112164.5  | GLP1R    | 0,000153857 | -3,016657311 |
| ENSG00000272398.5  | CD24     | 0,000162101 | 1,635424251  |
| ENSG00000135046.13 | ANXA1    | 0,000180439 | 1,656850355  |
| ENSG00000152583.12 | SPARCL1  | 0,000189992 | -2,059114019 |
| ENSG00000225972.1  | MTND1P23 | 0,000195058 | -2,155266015 |
| ENSG00000152779.13 | SLC16A12 | 0,000198382 | 2,85745643   |

|                    |            |             |              |
|--------------------|------------|-------------|--------------|
| ENSG00000146374.13 | RSPO3      | 0,000204707 | -3,848348902 |
| ENSG00000146072.6  | TNFRSF21   | 0,000206807 | -1,117483425 |
| ENSG00000104611.11 | SH2D4A     | 0,000209733 | 1,616945446  |
| ENSG00000164344.15 | KLKB1      | 0,000209733 | 2,40903816   |
| ENSG00000164093.15 | PITX2      | 0,000212382 | 1,950326266  |
| ENSG00000110848.8  | CD69       | 0,00024532  | 2,307304856  |
| ENSG00000235268.2  | KDM4E      | 0,000246036 | -6,767690837 |
| ENSG00000113532.12 | ST8SIA4    | 0,000250891 | 1,923426951  |
| ENSG00000073756.11 | PTGS2      | 0,000252896 | 1,86846534   |
| ENSG00000000005.5  | TNMD       | 0,000302621 | -1,609197925 |
| ENSG00000204959.4  | ARHGEF34P  | 0,000307839 | 2,746715861  |
| ENSG00000179083.6  | FAM133A    | 0,00030965  | 2,11810259   |
| ENSG00000145824.12 | CXCL14     | 0,000310692 | -1,634414033 |
| ENSG00000007372.21 | PAX6       | 0,000326011 | -1,53273734  |
| ENSG00000179008.8  | C14orf39   | 0,000333856 | 1,714494084  |
| ENSG00000163064.6  | EN1        | 0,000373191 | -2,296233999 |
| ENSG00000138135.6  | CH25H      | 0,000385308 | 3,536989146  |
| ENSG00000159388.5  | BTG2       | 0,000397127 | -1,149873187 |
| ENSG00000167165.18 | UGT1A6     | 0,000404859 | -1,691359228 |
| ENSG00000081818.3  | PCDHB4     | 0,000457398 | 2,794929347  |
| ENSG00000113319.12 | RASGRF2    | 0,000533816 | 1,710009173  |
| ENSG00000165633.12 | VSTM4      | 0,000596581 | 1,339410459  |
| ENSG00000189190.9  | ZNF600     | 0,000604131 | -3,216992944 |
| ENSG00000168004.9  | HRASLS5    | 0,000622107 | 1,20455123   |
| ENSG00000211448.11 | DIO2       | 0,000622107 | -3,323463031 |
| ENSG00000089127.12 | OAS1       | 0,000688351 | -2,99949137  |
| ENSG00000186297.11 | GABRA5     | 0,000747108 | 1,400506461  |
| ENSG00000163032.11 | VSNL1      | 0,000758425 | 1,284131796  |
| ENSG00000172318.5  | B3GALT1    | 0,000770446 | -1,610042792 |
| ENSG00000229544.8  | NKX1-2     | 0,000770446 | 1,959060458  |
| ENSG00000282278.1  | AC058822.1 | 0,000770446 | -2,233200866 |
| ENSG00000205835.8  | GMNC       | 0,000788024 | 4,856768281  |
| ENSG00000276219.4  | ZNF676     | 0,000788024 | -6,06732207  |
| ENSG00000151136.14 | BTBD11     | 0,000912008 | -1,572916627 |
| ENSG00000243955.5  | GSTA1      | 0,000935475 | -3,654593704 |
| ENSG00000205413.7  | SAMD9      | 0,001042652 | 2,07450292   |
| ENSG00000137968.16 | SLC44A5    | 0,001131598 | -1,958373361 |
| ENSG00000113749.7  | HRH2       | 0,001276119 | -3,526231058 |
| ENSG00000205111.8  | CDKL4      | 0,001359424 | 1,967688492  |
| ENSG00000053747.15 | LAMA3      | 0,001405376 | 1,521509372  |
| ENSG00000113140.10 | SPARC      | 0,001484351 | -2,86464053  |
| ENSG00000102271.13 | KLHL4      | 0,001643973 | 2,010452644  |
| ENSG00000183850.13 | ZNF730     | 0,001765995 | -2,377258953 |
| ENSG00000119938.8  | PPP1R3C    | 0,001853839 | 1,575247811  |
| ENSG00000112769.18 | LAMA4      | 0,001959756 | 1,465163464  |
| ENSG00000138061.11 | CYP1B1     | 0,002004429 | -2,361041651 |
| ENSG00000111801.15 | BTN3A3     | 0,002042605 | 1,031999121  |

|                    |               |             |              |
|--------------------|---------------|-------------|--------------|
| ENSG00000149050.9  | ZNF214        | 0,002103324 | -2,132499113 |
| ENSG00000133124.11 | IRS4          | 0,002337825 | 2,078179378  |
| ENSG00000136098.16 | NEK3          | 0,002337825 | 2,289976578  |
| ENSG00000182985.17 | CADM1         | 0,002351014 | 1,552910925  |
| ENSG00000065675.14 | PRKCQ         | 0,002390236 | 1,404662558  |
| ENSG00000185008.17 | ROBO2         | 0,002675836 | 0,997378516  |
| ENSG00000244509.3  | APOBEC3C      | 0,002806163 | -1,13570718  |
| ENSG00000120251.18 | GRIA2         | 0,002963324 | -2,382231603 |
| ENSG00000119888.10 | EPCAM         | 0,003005482 | 1,428593856  |
| ENSG00000180828.2  | BHLHE22       | 0,003005482 | 1,290302922  |
| ENSG00000204131.9  | NHSL2         | 0,003043956 | -1,291865598 |
| ENSG00000184613.10 | NELL2         | 0,003341412 | 1,387416355  |
| ENSG00000188153.12 | COL4A5        | 0,003439174 | -0,984517662 |
| ENSG00000078053.16 | AMPH          | 0,003461591 | 2,942075355  |
| ENSG00000196335.12 | STK31         | 0,003491305 | 1,389314512  |
| ENSG00000154065.16 | ANKRD29       | 0,003757987 | 2,243705688  |
| ENSG00000140285.9  | FGF7          | 0,003791218 | 1,550436913  |
| ENSG00000127329.15 | PTPRB         | 0,003849477 | -1,978158485 |
| ENSG00000176222.8  | ZNF404        | 0,004178641 | 1,583127749  |
| ENSG00000086205.16 | FOLH1         | 0,00469019  | 1,374693554  |
| ENSG00000122584.12 | NXPH1         | 0,00469019  | -2,334785354 |
| ENSG00000213809.8  | KLRK1         | 0,00469019  | 1,249593937  |
| ENSG00000134709.10 | HOOK1         | 0,004777414 | 2,047441004  |
| ENSG00000168016.13 | TRANK1        | 0,00479633  | 2,458034466  |
| ENSG00000147255.18 | IGSF1         | 0,004978066 | -1,090399346 |
| ENSG00000162630.5  | B3GALT2       | 0,004978066 | 1,623865308  |
| ENSG00000067715.13 | SYT1          | 0,00499675  | 1,757855655  |
| ENSG00000077092.18 | RARB          | 0,004999942 | 1,576625887  |
| ENSG00000112837.16 | TBX18         | 0,004999942 | -5,288557906 |
| ENSG00000138759.18 | FRAS1         | 0,005381912 | 1,226231689  |
| ENSG00000197410.12 | DCHS2         | 0,005712886 | 1,543210134  |
| ENSG00000284227.1  | DCHS2         | 0,005712886 | 1,543210134  |
| ENSG00000261263.2  | AC138907.5    | 0,006104556 | 3,660686114  |
| ENSG00000179431.6  | FJX1          | 0,006454915 | -1,139359241 |
| ENSG00000117148.7  | ACTL8         | 0,00663589  | -2,058487045 |
| ENSG00000068781.21 | STON1-GTF2A1L | 0,007091077 | -1,530340732 |
| ENSG00000166349.9  | RAG1          | 0,007091077 | -2,38980673  |
| ENSG00000091490.10 | SEL1L3        | 0,007276661 | 1,323786096  |
| ENSG00000079257.7  | LXN           | 0,007430446 | -1,455886706 |
| ENSG00000213424.8  | KRT222        | 0,007430446 | 3,92980483   |
| ENSG00000163565.18 | IFI16         | 0,007672389 | -1,621112495 |
| ENSG00000074527.11 | NTN4          | 0,007723238 | 1,102125221  |
| ENSG00000123388.4  | HOXC11        | 0,007843727 | 2,185322134  |
| ENSG00000165092.12 | ALDH1A1       | 0,007845648 | 2,631035728  |
| ENSG00000169439.11 | SDC2          | 0,007965431 | -1,28550149  |
| ENSG00000244119.1  | PDCL3P4       | 0,008066443 | 1,389285572  |
| ENSG00000164266.10 | SPINK1        | 0,008167808 | -3,989197129 |

|                    |            |             |              |
|--------------------|------------|-------------|--------------|
| ENSG00000198719.8  | DLL1       | 0,008228801 | 2,136544537  |
| ENSG00000275555.2  | DLL1       | 0,008228801 | 2,136544537  |
| ENSG00000105928.13 | GSDME      | 0,008387249 | 1,06851094   |
| ENSG00000006377.10 | DLX6       | 0,008437771 | -1,049533065 |
| ENSG00000179750.15 | APOBEC3B   | 0,008596224 | -3,868439489 |
| ENSG00000125820.5  | NKX2-2     | 0,008653705 | -1,380674532 |
| ENSG00000169908.11 | TM4SF1     | 0,00866468  | 1,148711305  |
| ENSG00000143341.11 | HMCN1      | 0,008726876 | -3,604061358 |
| ENSG00000186265.9  | BTLA       | 0,009176583 | -2,299666805 |
| ENSG00000120451.10 | SNX19      | 0,009775793 | 0,927451978  |
| ENSG00000112414.14 | ADGRG6     | 0,010450881 | 2,075211762  |
| ENSG00000203995.9  | ZYG11A     | 0,010591727 | 1,283051851  |
| ENSG00000176406.22 | RIMS2      | 0,010685455 | 1,107488186  |
| ENSG00000171956.6  | FOXB1      | 0,010874957 | -3,476797352 |
| ENSG00000120907.17 | ADRA1A     | 0,011202236 | 1,125846664  |
| ENSG00000188112.8  | C6orf132   | 0,012274813 | -1,608771646 |
| ENSG00000111432.4  | FZD10      | 0,012640992 | -1,070572935 |
| ENSG00000166801.15 | FAM111A    | 0,012660725 | 1,418852278  |
| ENSG00000196968.10 | FUT11      | 0,013456905 | -0,982191362 |
| ENSG00000090530.9  | P3H2       | 0,013542039 | 1,720769037  |
| ENSG00000163673.7  | DCLK3      | 0,014176021 | 3,68226767   |
| ENSG00000060140.8  | STYK1      | 0,014330222 | 1,380507417  |
| ENSG00000155754.14 | C2CD6      | 0,014611145 | -4,618905427 |
| ENSG00000133401.15 | PDZD2      | 0,014685056 | 1,003886711  |
| ENSG00000260062.3  | GOLGA2P11  | 0,014766051 | 1,325292208  |
| ENSG00000157502.13 | MUM1L1     | 0,015653392 | -3,822970846 |
| ENSG00000153246.12 | PLA2R1     | 0,016058359 | 2,138555486  |
| ENSG00000138670.17 | RASGEF1B   | 0,016157999 | -1,210011793 |
| ENSG00000153253.16 | SCN3A      | 0,016157999 | 2,797488216  |
| ENSG00000145730.20 | PAM        | 0,016165705 | 1,229168484  |
| ENSG00000204442.3  | FAM155A    | 0,016220404 | -1,834370461 |
| ENSG00000225968.7  | ELFN1      | 0,016473905 | -5,829227834 |
| ENSG00000135324.5  | MRAP2      | 0,01765477  | 1,199267338  |
| ENSG00000112276.13 | BVES       | 0,017767415 | -1,604779155 |
| ENSG00000176928.5  | GCNT4      | 0,018002208 | -1,84712385  |
| ENSG00000231672.6  | DIRC3      | 0,018002208 | 1,676155751  |
| ENSG00000172020.12 | GAP43      | 0,019231447 | -2,290709041 |
| ENSG00000176399.3  | DMRTA1     | 0,019429429 | -1,354291702 |
| ENSG00000178568.14 | ERBB4      | 0,019760239 | -4,212246387 |
| ENSG00000111846.16 | GCNT2      | 0,019990889 | -1,211043557 |
| ENSG00000137462.6  | TLR2       | 0,019990889 | 1,119006796  |
| ENSG00000227986.1  | TRIM60P18  | 0,021158262 | -3,564254497 |
| ENSG00000186462.8  | NAP1L2     | 0,021379115 | 1,051827322  |
| ENSG00000197013.9  | ZNF429     | 0,021508416 | -0,935778361 |
| ENSG00000103241.6  | FOXF1      | 0,02300446  | 1,798695663  |
| ENSG00000254979.5  | AP000781.2 | 0,02300446  | -3,299121634 |
| ENSG00000090376.10 | IRAK3      | 0,023169253 | -1,797692153 |



|                    |            |             |              |
|--------------------|------------|-------------|--------------|
| ENSG00000136158.11 | SPRY2      | 0,023962238 | 0,818120061  |
| ENSG00000101004.14 | NINL       | 0,024008657 | 1,097157931  |
| ENSG00000178538.9  | CA8        | 0,024434089 | -1,326435603 |
| ENSG00000043355.11 | ZIC2       | 0,024790284 | 0,996326326  |
| ENSG00000253813.1  | COX6B1P4   | 0,025015792 | 5,169725673  |
| ENSG00000133134.11 | BEX2       | 0,025306285 | -2,931102301 |
| ENSG00000134533.6  | RERG       | 0,026052855 | 1,759979623  |
| ENSG00000163618.17 | CADPS      | 0,026649045 | -1,665255553 |
| ENSG00000134042.12 | MRO        | 0,026809228 | 1,802202008  |
| ENSG00000111700.12 | SLCO1B3    | 0,028629516 | -6,066077898 |
| ENSG00000232196.3  | MTRNR2L4   | 0,028629516 | -1,05410956  |
| ENSG00000170989.8  | S1PR1      | 0,029303058 | 1,043897162  |
| ENSG00000260548.1  | AL035425.2 | 0,029303058 | 2,531990461  |
| ENSG00000278728.2  | CNTNAP2    | 0,029303058 | -1,125227303 |
| ENSG00000159899.14 | NPR2       | 0,02953039  | -0,98212061  |
| ENSG00000281020.2  | SNTG2      | 0,031042594 | 1,822615613  |
| ENSG00000137463.4  | MGARP      | 0,031661036 | -1,54912517  |
| ENSG00000166689.15 | PLEKHA7    | 0,033552025 | 0,885309058  |
| ENSG00000165084.15 | C8orf34    | 0,033929592 | -1,494960488 |
| ENSG00000176658.16 | MYO1D      | 0,03394154  | 0,933863448  |
| ENSG00000115339.13 | GALNT3     | 0,034371352 | 1,852468666  |
| ENSG00000123119.11 | NECAB1     | 0,034755775 | 1,519402396  |
| ENSG00000134595.8  | SOX3       | 0,034755775 | 3,300365161  |
| ENSG00000085563.14 | ABCB1      | 0,034863264 | 1,306293237  |
| ENSG00000018236.14 | CNTN1      | 0,035831515 | 1,409626424  |
| ENSG00000142677.3  | IL22RA1    | 0,036272473 | 2,729362435  |
| ENSG00000270672.1  | MTRNR2L6   | 0,041227426 | -1,300472508 |
| ENSG00000186439.12 | TRDN       | 0,041482819 | 3,382813362  |
| ENSG00000160191.17 | PDE9A      | 0,041799653 | 1,338753937  |
| ENSG00000006468.13 | ETV1       | 0,042678167 | 1,22875416   |
| ENSG00000138400.12 | MDH1B      | 0,042710852 | 1,73060692   |
| ENSG00000185483.11 | ROR1       | 0,042759482 | 1,916242643  |
| ENSG00000009694.13 | TENM1      | 0,043080922 | 2,650562943  |
| ENSG00000013619.13 | MAMLD1     | 0,043439517 | -1,081258583 |
| ENSG00000109424.3  | UCP1       | 0,044384336 | 0,847163089  |
| ENSG00000262560.1  | AC018512.1 | 0,045030957 | 5,606112451  |
| ENSG00000147256.11 | ARHGAP36   | 0,04512278  | -2,023253035 |
| ENSG00000169306.9  | IL1RAPL1   | 0,04512278  | 1,112562134  |
| ENSG00000158089.14 | GALNT14    | 0,046395156 | -2,346225578 |
| ENSG00000221887.5  | HMSD       | 0,046395156 | 1,140797822  |
| ENSG00000197635.9  | DPP4       | 0,048408542 | 1,273893706  |
| ENSG00000173705.8  | SUSD5      | 0,048415162 | -0,795493213 |
| ENSG00000050327.14 | ARHGEF5    | 0,049195089 | 1,761509183  |
| ENSG00000163492.14 | CCDC141    | 0,049211479 | 1,124933876  |

**Supplementary Table S2:** Significantly altered GO-terms of the transcriptome analysis comparing HAP1 wild-type and HAP1 KDELR1-KO cells, listed with their term-associated deregulated genes and the corresponding fold-change.

| Gene name                             | Fold-change | Gene name | Fold-change |
|---------------------------------------|-------------|-----------|-------------|
| <b>GO-term: Developmental process</b> |             |           |             |
| ACTL8                                 | -2,06       | KLKB1     | 2,41        |
| ACVR1C                                | 3,15        | KLRK1     | 1,25        |
| ADAM9                                 | -9,77       | LAMA3     | 1,52        |
| ADAMTS20                              | 3,53        | LAMA4     | 1,47        |
| ALDH1A2                               | 2,95        | LRGUK     | 1,77        |
| ALX4                                  | -5,30       | MAB21L1   | 1,69        |
| AMBN                                  | -4,13       | MAF       | 1,29        |
| ANGPTL2                               | -4,76       | MAP2      | 2,09        |
| ANXA1                                 | 1,66        | MCTP2     | 2,93        |
| BCHE                                  | 2,14        | MKX       | 3,67        |
| BHLHE22                               | 1,29        | MLF1      | -3,82       |
| BMP7                                  | -9,18       | NEK3      | 2,29        |
| BNC1                                  | 3,34        | NELL1     | -2,03       |
| BST2                                  | -8,24       | NEUROG2   | 2,19        |
| BTG2                                  | -1,15       | NKX1-2    | 1,96        |
| CABYR                                 | 1,89        | NKX2-2    | -1,38       |
| CADM1                                 | 1,50        | NLGN4X    | -7,72       |
| CD24                                  | 1,64        | NTN4      | 1,10        |
| CD36                                  | 1,91        | PAX6      | -1,53       |
| CD44                                  | -3,64       | PCDH17    | 1,38        |
| CHMP4C                                | -3,20       | PCDHB4    | 2,79        |
| CHODL                                 | 3,52        | PCDHB5    | 1,48        |
| CHRM3                                 | 2,11        | PDGFRA    | -1,96       |
| CLDN1                                 | 1,31        | PITX2     | 1,95        |
| CNTN3                                 | 5,46        | PLPPR4    | 2,80        |
| COL11A1                               | -5,86       | PREX2     | -2,06       |
| COL5A2                                | 2,78        | PRKCQ     | 1,40        |
| CXCL12                                | 7,63        | PROM1     | 2,45        |
| CXCL14                                | -1,63       | PTGS2     | 1,87        |
| CYP1B1                                | -2,36       | PTN       | 7,99        |
| CYR61                                 | -1,52       | PTBRB     | -1,98       |
| DAZL                                  | -4,05       | RAG1      | -2,39       |
| DLL1                                  | 2,14        | RARB      | 1,58        |
| DLX6                                  | -1,05       | RELN      | -2,26       |
| DNER                                  | 2,46        | RIPK4     | 3,38        |
| EBF2                                  | 4,38        | ROBO2     | 1,00        |
| EFNB2                                 | -2,16       | RP1       | 2,18        |
| EHF                                   | -2,82       | RSPO3     | -3,85       |
| EMP1                                  | -3,80       | S1PR3     | 2,62        |
| EMX2                                  | 3,0         | SDC2      | -1,29       |
| EN1                                   | -2,30       | SERPINI1  | 2,51        |
| ENC1                                  | -2,36       | SHISA2    | 1,36        |
| ENPEP                                 | -2,79       | SHROOM3   | -2,17       |
| ENPP2                                 | -4,27       | SLCO4C1   | 2,17        |
| EPCAM                                 | 1,43        | SNTG2     | 1,82        |
| EPHA5                                 | 7,16        | SNX19     | 0,93        |

|                                                |       |          |       |
|------------------------------------------------|-------|----------|-------|
| ETS1                                           | 1,43  | SOX1     | 2,93  |
| EYA1                                           | 2,64  | SP8      | 2,12  |
| FAT3                                           | -4,45 | SPARC    | -2,86 |
| FGF4                                           | -2,28 | ST8SIA4  | 1,92  |
| FGF7                                           | 1,55  | SYK      | 2,31  |
| FJX1                                           | -1,14 | SYNE1    | 1,63  |
| FRAS1                                          | 1,23  | SYT1     | 1,76  |
| FUT9                                           | -6,16 | TBX18    | -5,29 |
| GABRA5                                         | 1,40  | THBS2    | -6,44 |
| GJB6                                           | 1,32  | TIAM1    | 3,31  |
| GSTA1                                          | -3,65 | TIMP3    | 1,48  |
| GSTM3                                          | 1,59  | TLE1     | 1,74  |
| HAND2                                          | 1,79  | TLL1     | 2,78  |
| HCLS1                                          | -8,21 | TMEFF2   | 2,09  |
| HES1                                           | -1,63 | TNFRSF21 | -1,12 |
| HEY1                                           | 5,48  | TNMD     | -1,61 |
| HOOK1                                          | 2,05  | TRABD2A  | -1,30 |
| HOXB7                                          | -6,76 | TRO      | -3,39 |
| HOXC11                                         | 2,16  | VCAN     | -2,77 |
| HOXC9                                          | -2,55 | VGLL2    | 6,05  |
| HOXD13                                         | 1,56  | VIM      | -5,03 |
| HPGD                                           | 1,87  | VWC2     | 3,82  |
| HRH2                                           | -3,53 | WIF1     | -7,25 |
| IFI16                                          | -1,62 |          |       |
|                                                |       |          |       |
| <b>GO-term: Cellular developmental process</b> |       |          |       |
| ACTL8                                          | -2,06 | IFI16    | -1,62 |
| ACVR1C                                         | 3,15  | KLRK1    | 1,25  |
| ADAMTS20                                       | 3,53  | LAMA3    | 1,52  |
| ADAM9                                          | -9,77 | LAMA4    | 1,47  |
| ALDH1A2                                        | 2,95  | LRGUK    | 1,77  |
| ANXA1                                          | 1,66  | MAF      | 1,29  |
| BCHE                                           | 2,14  | MAP2     | 2,09  |
| BHLHE22                                        | 1,29  | MLF1     | -3,82 |
| BMP7                                           | -9,18 | NEK3     | 2,29  |
| BTG2                                           | -1,15 | NELL1    | -2,03 |
| CADM1                                          | 1,50  | NEUROG2  | 2,19  |
| CABYR                                          | 1,89  | NKX2-2   | -1,38 |
| CD24                                           | 1,64  | NLGN4X   | -7,72 |
| CD36                                           | 1,91  | NTN4     | 1,10  |
| CHODL                                          | 3,52  | PAX6     | -1,53 |
| COL11A1                                        | -5,86 | PDGFRA   | -1,96 |
| COL5A2                                         | 2,78  | PITX2    | 1,95  |
| CXCL12                                         | 7,63  | PLPPR4   | 2,80  |
| CXCL14                                         | -1,63 | PREX2    | -2,06 |
| CYR61                                          | -1,52 | PRKCQ    | 1,40  |
| DAZL                                           | -4,05 | PROM1    | 2,45  |
| DLL1                                           | 2,14  | PTGS2    | 1,87  |
| DLX6                                           | -1,05 | PTN      | 7,99  |
| DNER                                           | 2,46  | RAG1     | -2,39 |
| EBF2                                           | 4,38  | RARB     | 1,58  |
| EFNB2                                          | -2,16 | RELN     | -2,26 |
| EHF                                            | -2,82 | ROBO2    | 1,00  |
| EMX2                                           | 3,0   | RP1      | 2,18  |

|                                             |       |          |       |
|---------------------------------------------|-------|----------|-------|
| EN1                                         | -2,30 | S1PR3    | 2,26  |
| ENC1                                        | -2,36 | SDC2     | -1,29 |
| ENPP2                                       | -4,27 | SHROOM3  | -2,17 |
| EPCAM                                       | 1,43  | SLCO4C1  | 2,17  |
| EPHA5                                       | 7,16  | SNX19    | 0,93  |
| ETS1                                        | 1,43  | SOX1     | 2,93  |
| EYA1                                        | 2,64  | SPARC    | -2,86 |
| FGF4                                        | -2,28 | SYK      | 2,31  |
| GABRA5                                      | 1,40  | SYNE1    | 1,63  |
| GSTA1                                       | -3,65 | SYT1     | 1,76  |
| GSTM3                                       | 1,59  | TIAM1    | 3,31  |
| HAND2                                       | 1,79  | TLL1     | 2,78  |
| HCLS1                                       | -8,21 | TNFRSF21 | -1,12 |
| HES1                                        | -1,63 | TNMD     | -1,61 |
| HEY2                                        | 5,48  | VCAN     | -2,77 |
| HOOK1                                       | 2,05  | VIM      | -5,03 |
| HOXB7                                       | -6,76 | VWC2     | 3,82  |
| HRH2                                        | -3,53 | WIF1     | -7,25 |
| <b>GO-term: Biological adhesion</b>         |       |          |       |
| ADAM9                                       | -9,77 | HLA-DQB1 | 4,35  |
| ADGRE2                                      | -2,31 | KLRK1    | 1,25  |
| AMBN                                        | -4,13 | LAMA3    | 1,52  |
| ANXA1                                       | 1,66  | LAMA4    | 1,47  |
| ARHGAP6                                     | 1,98  | NLGN4X   | -7,72 |
| BMP7                                        | -9,18 | PCDH17   | 1,38  |
| BTLA                                        | -2,30 | PCDHB4   | 2,79  |
| CADM1                                       | 1,50  | PCDHB5   | 1,48  |
| CD24                                        | 1,64  | PDGFRA   | -1,96 |
| CD36                                        | 1,91  | PGM5     | 1,72  |
| CD44                                        | -3,64 | PRKCQ    | 1,40  |
| CLDN1                                       | 1,31  | PTN      | 7,99  |
| CNTN3                                       | 5,46  | RAG1     | -2,39 |
| COL4A6                                      | -4,69 | RELN     | -2,26 |
| CXCL12                                      | 7,63  | ROBO2    | 1,00  |
| CYP1B1                                      | -2,36 | SERPINI1 | 2,51  |
| CYR61                                       | -1,52 | SMOC2    | -3,56 |
| DCHS2                                       | 1,54  | SYK      | 2,31  |
| DLL1                                        | 2,14  | THBS2    | -6,44 |
| EFNB2                                       | -2,16 | TIAM1    | 3,31  |
| EPCAM                                       | 1,43  | TMEM47   | 3,54  |
| ETS1                                        | 1,43  | TNFRSF21 | -1,12 |
| FAT3                                        | -4,45 | TRO      | -3,39 |
| HES1                                        | -1,63 | VCAN     | -2,77 |
| HHLA2                                       | -2,08 | VWC2     | 3,82  |
| <b>GO-term: Regulation of cell adhesion</b> |       |          |       |
| ADAM9                                       | -9,77 | HES1     | -1,63 |
| ANXA1                                       | 1,66  | HHLA2    | -2,08 |
| ARHGAP6                                     | 1,98  | HLA-DQB1 | 4,35  |
| BMP7                                        | -9,18 | KLRK1    | 1,25  |
| BTLA                                        | -2,30 | LAMA3    | 1,52  |
| CD24                                        | 1,64  | LAMA4    | 1,47  |
| CD36                                        | 1,91  | PRKCQ    | 1,40  |

|                                                  |       |          |       |
|--------------------------------------------------|-------|----------|-------|
| CD44                                             | -3,64 | PTN      | 7,99  |
| CXCL12                                           | 7,63  | RAG1     | -2,39 |
| CYP1B1                                           | -2,36 | SERPINI1 | 2,51  |
| CYR61                                            | -1,52 | SMOC2    | -3,56 |
| DLL1                                             | 2,14  | SYK      | 2,31  |
| EFNB2                                            | -2,16 | TNFRSF21 | -1,12 |
| EPCAM                                            | 1,43  | VWC2     | 3,82  |
| ETS1                                             | 1,43  |          |       |
| <b>GO-term: Multicellular organismal process</b> |       |          |       |
| ACVR1C                                           | 3,15  | IL20RA   | 1,64  |
| ADAM9                                            | -9,77 | KCNMB2   | -1,79 |
| ALB                                              | 2,39  | KLKB1    | 2,41  |
| ALDH1A2                                          | 2,95  | KLRK1    | 1,25  |
| ALX4                                             | -5,30 | LAMA3    | 1,52  |
| AMBN                                             | -4,13 | LAMA4    | 1,47  |
| ANGPTL2                                          | -4,76 | LRGUK    | 1,77  |
| ANXA1                                            | 1,66  | LXN      | -1,46 |
| BCHE                                             | 2,14  | LY96     | 2,83  |
| BHLHE22                                          | 1,29  | MAB21L1  | 1,69  |
| BMP7                                             | -9,18 | MAF      | 1,29  |
| BST2                                             | -8,24 | MAP2     | 2,09  |
| BTG2                                             | -1,15 | MCTP2    | 2,93  |
| CABYR                                            | 1,89  | MKX      | 3,69  |
| CADM1                                            | 1,50  | MLF1     | -3,82 |
| CD24                                             | 1,64  | MYOF     | -2,69 |
| CD36                                             | 1,91  | MYOM1    | 1,83  |
| CD38                                             | 2,96  | NEK3     | 2,29  |
| CD44                                             | -3,64 | NELL1    | -2,03 |
| CHMP4C                                           | -3,20 | NEUROG2  | 2,19  |
| CHODL                                            | 3,52  | NKX1-2   | 1,96  |
| CHRM3                                            | 2,11  | NKX2-2   | -1,38 |
| CLDN1                                            | 1,31  | NLGN4X   | -7,72 |
| CNTN3                                            | 5,46  | NTN4     | 1,10  |
| COL11A1                                          | -5,86 | PAX6     | -1,53 |
| COL5A2                                           | 2,78  | PCDH17   | 1,38  |
| CSMD1                                            | -1,86 | PCDHB4   | 2,79  |
| CXCL12                                           | 7,63  | PCDHB5   | 1,48  |
| CXCL14                                           | -1,63 | PDGFRA   | -1,96 |
| CYP1B1                                           | -2,36 | PITX2    | 1,95  |
| CYR61                                            | -1,52 | PLPPR4   | 2,80  |
| DAZL                                             | -4,05 | PREX2    | -2,06 |
| DLL1                                             | 2,14  | PRKCQ    | 1,40  |
| DLX6                                             | -1,05 | PROM1    | 2,45  |
| DNER                                             | 2,46  | PTGS2    | 1,87  |
| DTNA                                             | -2,49 | PTN      | 7,99  |
| EBF2                                             | 4,38  | PTPRB    | -1,98 |
| EFNB2                                            | -2,16 | RAG1     | -2,39 |
| EHF                                              | -2,82 | RARB     | 1,58  |
| EMP1                                             | -3,80 | RELN     | -2,26 |
| EMX2                                             | 3,0   | ROBO2    | 1,00  |
| EN1                                              | -2,30 | RP1      | 2,18  |
| ENC1                                             | -2,36 | RSPO3    | -3,85 |
| ENPEP                                            | -2,79 | S1PR3    | 2,62  |

|                                                    |       |          |       |
|----------------------------------------------------|-------|----------|-------|
| ENPP2                                              | -4,27 | SDC2     | -1,29 |
| EPCAM                                              | 1,43  | SERPINI1 | 2,51  |
| EPHA5                                              | 7,16  | SHISA2   | 1,36  |
| ETS1                                               | 1,43  | SHROOM3  | -2,05 |
| EYA1                                               | 2,64  | SLCO4C1  | 2,17  |
| FAT3                                               | -4,45 | SNTG2    | 1,82  |
| FGF4                                               | -2,28 | SNX19    | 0,93  |
| FGF7                                               | 1,55  | SOX1     | 2,93  |
| FJX1                                               | -1,14 | SP8      | 2,12  |
| FRAS1                                              | 1,23  | SPARC    | -2,86 |
| FUT9                                               | -6,16 | ST8SIA4  | 1,92  |
| GABRA5                                             | 1,40  | SYK      | 2,31  |
| GJB6                                               | 1,32  | SYT1     | 1,76  |
| GLP1R                                              | -3,02 | TBX18    | -5,29 |
| GSTM3                                              | 1,59  | THBS2    | -6,44 |
| HAND2                                              | 1,79  | TIAM1    | 3,31  |
| HCLS1                                              | -8,21 | TIMP3    | 1,48  |
| HES1                                               | -1,63 | TLE1     | 1,74  |
| HEY2                                               | 5,48  | TLL1     | 2,78  |
| HHLA2                                              | -2,08 | TNFRSF21 | -1,12 |
| HMCN1                                              | -3,60 | TNMD     | -1,61 |
| HOOK1                                              | 2,05  | TRO      | -3,39 |
| HOXB7                                              | -6,76 | VCAN     | -2,77 |
| HOXC11                                             | 2,16  | VGLL2    | 6,05  |
| HOXC9                                              | -2,55 | VIM      | -5,03 |
| HOXD13                                             | 1,56  | VWC2     | 3,82  |
| HPGD                                               | 1,87  | WIF1     | -7,25 |
| HRH2                                               | -3,53 |          |       |
| IFI16                                              | -1,62 |          |       |
| <b>GO-term: Multicellular organism development</b> |       |          |       |
| ACVR1C                                             | 3,15  | KLKB1    | 2,41  |
| ADAM9                                              | -9,77 | LAMA3    | 1,52  |
| ALDH1A2                                            | 2,95  | LAMA4    | 1,47  |
| ALX4                                               | -5,30 | MAB21L1  | 1,69  |
| AMBN                                               | -4,13 | MAF      | 1,29  |
| ANGPTL2                                            | -4,76 | MAP2     | 2,09  |
| ANXA1                                              | 1,66  | MCTP2    | 2,93  |
| BCHE                                               | 2,14  | MKX      | 3,67  |
| BHLHE22                                            | 1,29  | MLF1     | -3,82 |
| BMP7                                               | -9,18 | NEK3     | 2,29  |
| BST2                                               | -8,24 | NELL1    | -2,03 |
| BTG2                                               | -1,15 | NEUROG2  | 2,19  |
| CADM1                                              | 1,50  | NKX1-2   | 1,96  |
| CD24                                               | 1,64  | NKX2-2   | -1,38 |
| CD44                                               | -3,64 | NLGN4X   | -7,72 |
| CHMP4C                                             | -3,20 | NTN4     | 1,10  |
| CHODL                                              | 3,52  | PAX6     | -1,53 |
| CHRM3                                              | 2,11  | PCDH17   | 1,38  |
| CLDN1                                              | 1,31  | PCDHB4   | 2,79  |
| CNTN3                                              | 5,46  | PCDHB5   | 1,48  |
| COL11A1                                            | -5,86 | PDGFRA   | -1,96 |
| COL5A2                                             | 2,78  | PITX2    | 1,95  |
| CXCL12                                             | 7,63  | PLPPR4   | 2,80  |

|                                      |       |          |       |
|--------------------------------------|-------|----------|-------|
| CXCL14                               | -1,63 | PREX2    | -2,06 |
| CYP1B1                               | -2,36 | PRKCQ    | 1,40  |
| CYR61                                | -1,52 | PROM1    | 2,45  |
| DAZL                                 | -4,05 | PTGS2    | 1,87  |
| DLL1                                 | 2,14  | PTN      | 7,99  |
| DLX6                                 | -1,05 | PTPRB    | -1,98 |
| DNER                                 | 2,46  | RAG1     | -2,39 |
| EBF2                                 | 4,38  | RARB     | 1,58  |
| EFNB2                                | -2,16 | RELN     | -2,26 |
| EHF                                  | -2,82 | ROBO2    | 1,00  |
| EMP1                                 | -3,80 | RP1      | 2,18  |
| EMX2                                 | 3,0   | RSPO3    | -3,85 |
| EN1                                  | -2,30 | S1PR3    | 2,62  |
| ENC1                                 | -2,36 | SDC2     | -1,29 |
| ENPEP                                | -2,79 | SERPINI1 | 2,51  |
| ENPP2                                | -4,27 | SHISA2   | 1,36  |
| EPCAM                                | 1,43  | SHROOM3  | -2,17 |
| EPHA5                                | 7,16  | SLCO4C1  | 2,17  |
| ETS1                                 | 1,43  | SNTG2    | 1,82  |
| EYA1                                 | 2,64  | SNX19    | 0,93  |
| FAT3                                 | -4,45 | SOX1     | 2,93  |
| FGF4                                 | -2,28 | SP8      | 2,12  |
| FGF7                                 | 1,55  | SPARC    | -2,86 |
| FJX1                                 | -1,14 | ST8SIA4  | 1,92  |
| FRAS1                                | 1,23  | SYK      | 2,31  |
| FUT9                                 | -6,16 | SYT1     | 1,76  |
| GABRA5                               | 1,40  | TBX18    | -5,29 |
| GJB6                                 | 1,32  | THBS2    | -6,44 |
| GSTM3                                | 1,59  | TIAM1    | 3,31  |
| HAND2                                | 1,79  | TIMP3    | 1,48  |
| HCLS1                                | -8,21 | TLE1     | 1,74  |
| HES1                                 | -1,63 | TLL1     | 2,78  |
| HEY2                                 | 5,48  | TNFRSF21 | -1,12 |
| HOOK1                                | 2,05  | TNMD     | -1,61 |
| HOXB7                                | -6,76 | TRO      | -3,39 |
| HOXC11                               | 2,16  | VCAN     | -2,77 |
| HOXC9                                | -2,55 | VGLL2    | 6,05  |
| HOXD13                               | 1,56  | VIM      | -5,03 |
| HPGD                                 | 1,87  | VWC2     | 3,82  |
| HRH2                                 | -3,53 | WIF1     | -7,25 |
| IFI16                                | -1,62 |          |       |
| <b>GO-term: Extracellular matrix</b> |       |          |       |
| ADAMTS20                             | 3,53  | LAMA4    | 1,47  |
| ALB                                  | 2,39  | NTN4     | 1,10  |
| AMBN                                 | -4,13 | PTN      | 7,99  |
| BMP7                                 | -9,18 | RELN     | -2,26 |
| COL11A1                              | -5,86 | SMOC2    | -3,76 |
| COL4A5                               | -0,98 | SPARC    | -2,86 |
| COL4A6                               | -4,69 | SPARCL1  | -2,19 |
| COL5A2                               | 2,78  | THBS2    | -6,44 |
| CYR61                                | -1,52 | TIMP3    | 1,48  |
| FRAS1                                | 1,23  | VCAN     | -2,77 |
| HMCN1                                | -3,60 | VWC2     | 3,82  |

|                                                |       |       |       |
|------------------------------------------------|-------|-------|-------|
| LAMA3                                          | 1,52  |       |       |
| <b>GO-term: Extracellular matrix component</b> |       |       |       |
| ALB                                            | 2,39  | LAMA4 | 1,47  |
| COL11A1                                        | -5,86 | NTN4  | 1,10  |
| COL4A5                                         | -0,98 | PTN   | 7,99  |
| COL4A6                                         | -4,69 | SMOC2 | -3,76 |
| COL5A2                                         | 2,78  | SPARC | -2,86 |
| FRAS1                                          | 1,23  | THBS2 | -6,44 |
| HMCN1                                          | -3,60 | TIMP3 | 1,48  |
| LAMA3                                          | 1,52  | VWC2  | 3,82  |
| <b>GO-term: Glycosaminoglycan binding</b>      |       |       |       |
| ADGRE2                                         | -2,31 | LXN   | -1,46 |
| BMP7                                           | -9,18 | NELL2 | 1,39  |
| CD44                                           | -3,64 | PTN   | 7,99  |
| CYR61                                          | -1,52 | RSPO3 | -3,85 |
| FGF4                                           | -2,28 | SMOC2 | -3,76 |
| FGF7                                           | 1,55  | THBS2 | -6,44 |
| VCAN                                           | -2,77 |       |       |



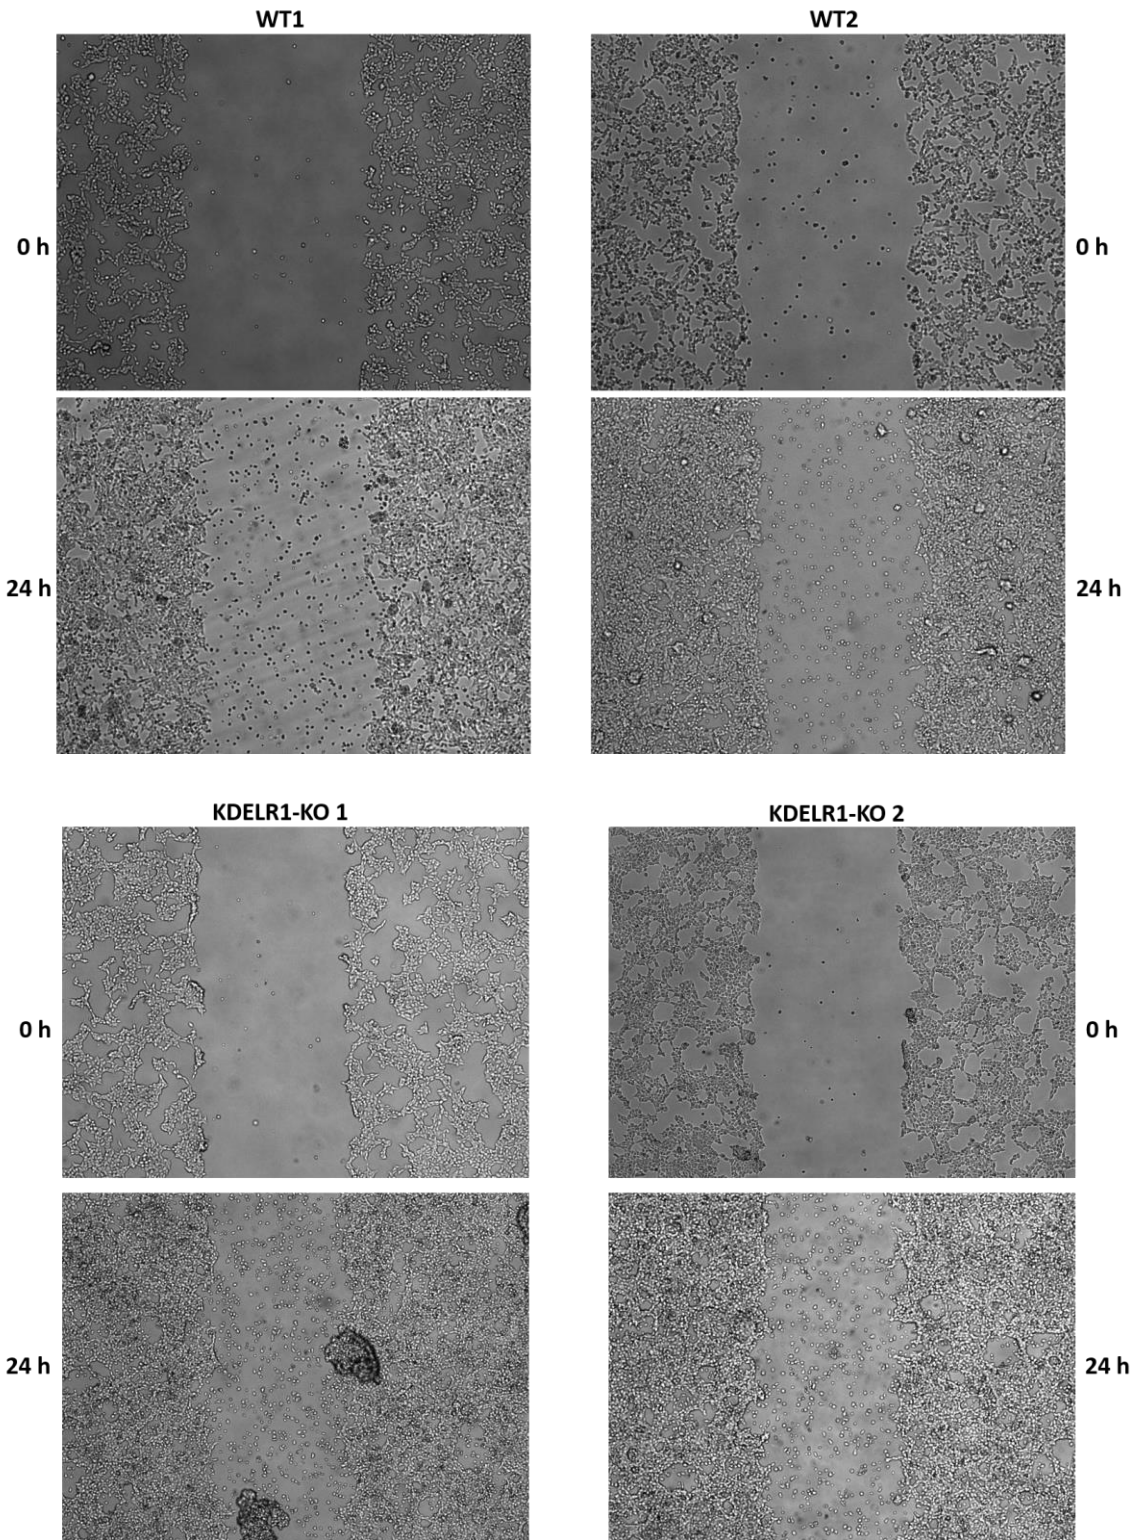

**Supplementary Figure S3:** Images of HAP1 wild-type and KDELR1-KO cells analysed via *in vivo* scratch assay after 0 and 24 h.
